# Supplementary material
Source: MDPI journal article supplement (https://www.mdpi.com/2072-4292/9/8/791)
Supplement: s1 [file s1]

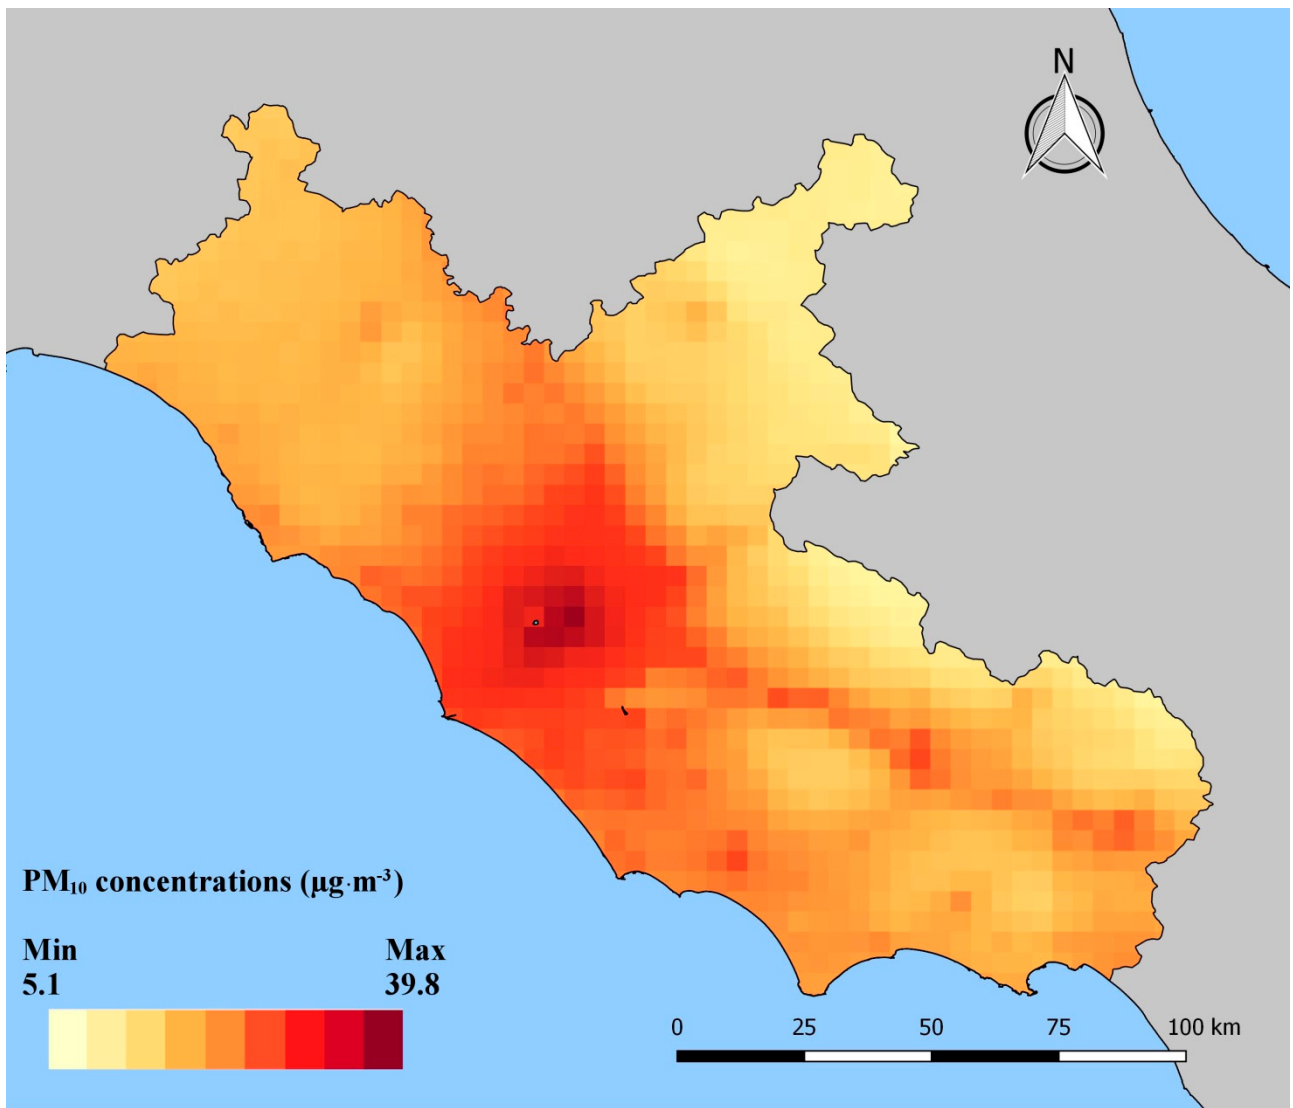

Figure S1. Particulate Matter (PM<sub>10</sub>) annual average concentration map derived from the AMS-MINNI model simulations (2010)

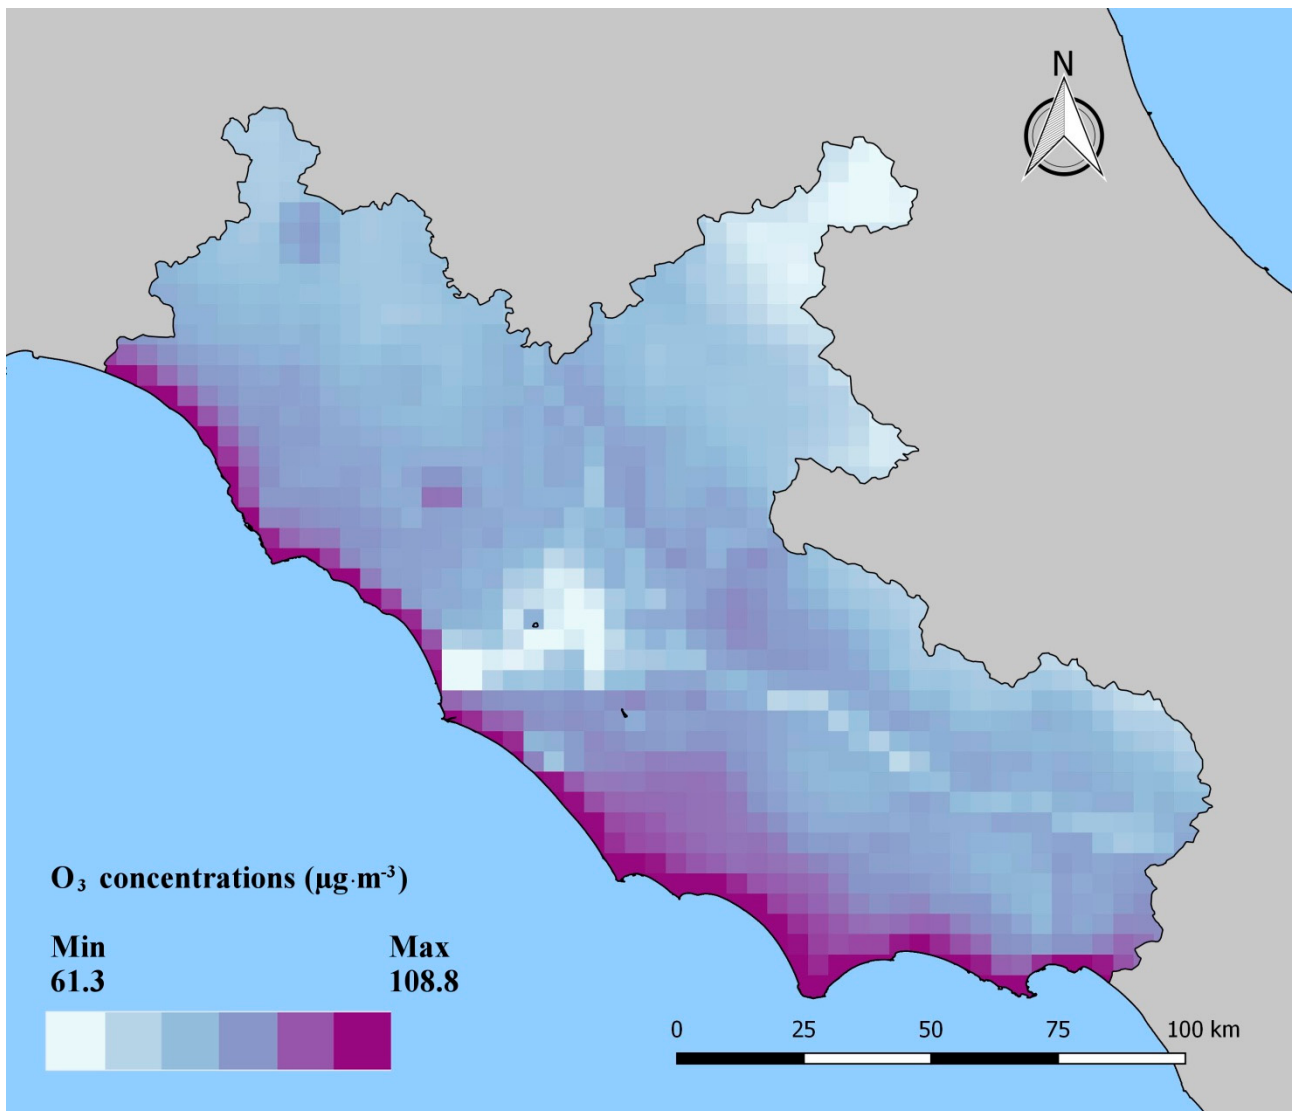

Figure S2. Tropospheric ozone ( $O_3$ ) annual average concentration map derived from the AMS-MINNI model simulations (2010)
